# Supplementary material for: Resilience in advanced cancer caregiving. A systematic review and meta-synthesis
Source: PubMed Central journal article supplement — Palliat Med. 2022 Jan 5;36(1):44–58. doi: 10.1177/02692163211057749 (PMC8796166; doi:10.1177/02692163211057749), 2022-01-05
Supplement: sj-pdf-1-pmj-10.1177_02692163211057749.pdf [file sj-pdf-1-pmj-10.1177_02692163211057749.pdf]

## Supplement 1: Search strategy

PubMed

2840 hits on 01/03/2019

(((((((((((((((((((((((((((((((((((((((((((((((((((((((((((("Caregivers"[Mesh]) OR caregivers[tiab]) OR caregiver[tiab]) OR  
 carer[tiab]) OR carers[tiab]) OR "family caregiver"[tiab]) OR "family caregivers"[tiab]) OR "informal  
 caregiver"[tiab]) OR "informal caregivers"[tiab]) OR "Spouses"[Mesh]) OR spouses[tiab]) OR spouse[tiab]) OR  
 partner[tiab]) OR husband[tiab]) OR wife[tiab]) OR "Family"[Mesh:noexp]) OR family[tiab]) OR "next of  
 kin"[tiab]) OR dependants[tiab]) OR dependents[tiab]) OR "adult children"[tiab]) OR "Fathers"[Mesh]) OR  
 fathers[tiab]) OR father[tiab]) OR "Mothers"[Mesh]) OR mothers[tiab]) OR mother[tiab]) OR  
 "Grandparents"[Mesh]) OR grandparents[tiab]) OR grandparent[tiab]) OR grand-parent\*[tiab]) OR  
 "Siblings"[Mesh]) OR siblings[tiab]) OR sibling[tiab]) OR brother\*[tiab]) OR sister\*[tiab]) OR  
 "Friends"[Mesh]) OR friends[tiab]) OR friend[tiab]) OR relatives[tiab])) AND  
 (((((((((((((((((((((((((((((((((((((((((((((((((((((((((((("Resilience, Psychological"[Mesh]) OR psychological  
 resilience[tiab]) OR "psychological resilience"[tiab]) OR "personal resilience"[tiab]) OR resilience[tiab]) OR  
 resiliency[tiab]) OR resilient[tiab]) OR well-being[tiab]) OR wellbeing[tiab]) OR "equanimity"[tiab]) OR  
 "perseverance"[tiab]) OR "self-reliance"[tiab]) OR "meaningfulness"[tiab]) OR "existential aloneness"[tiab])  
 OR "flexibility"[tiab]) OR "positivism"[tiab]) OR "self-initiative"[tiab]) OR "positive psychological  
 functioning"[tiab]) OR ("Emotional Adjustment"[Mesh:noexp]) OR "Adaptation,  
 Psychological"[Mesh:noexp]) OR "Posttraumatic Growth, Psychological"[Mesh])) OR "emotional  
 adjustment"[tiab]) OR "emotional equilibrium"[tiab]) OR "personal adjustment"[tiab]) OR "psychological  
 adjustment"[tiab]) OR "emotional competence"[tiab]) OR "psychological adaptation"[tiab]) OR "coping  
 behavior"[tiab]) OR "coping behaviour"[tiab]) OR "coping ability"[tiab]) OR "coping mechanism"[tiab]) OR  
 coping-mechanism\*[tiab]) OR "coping strategy"[tiab]) OR "psychologic adaptation"[tiab]) OR "personal  
 growth"[tiab]) OR PG[tiab]) OR "post-traumatic growth"[tiab]) OR PTG[tiab]) OR "healthy adjustment"[tiab])  
 OR "benefit finding"[tiab]) OR "positive outcome"[tiab]) OR beneficial[tiab]) OR "perceived rewards"[tiab])  
 OR "positive consequences"[tiab]) OR "self-efficacy"[Mesh]) OR "self efficacy"[tiab]) OR "positive  
 coping"[tiab]) OR "adaptive coping"[tiab]) OR "problem solving skills"[tiab]) OR "coping skills"[tiab]) OR  
 "Social Skills"[Mesh]) OR "interpersonal skills"[tiab]) OR "social skills"[tiab]) OR "social skill"[tiab]) OR  
 "social competence"[tiab]) OR "social ability"[tiab])) AND (((((((((((((((((((((((((((((((((((((((((((((((((((((((((((("Neoplasm  
 Metastasis"[Mesh:noexp]) OR "neoplasms"[Mesh:noexp]) OR "advanced cancer"[tiab]) OR "incurable

cancer"[tiab]) OR "palliative cancer"[tiab]) OR "terminal cancer"[tiab]) OR "cancer dissemination"[tiab]) OR "cancer metastasis"[tiab]) OR "carcinoma metastasis"[tiab]) OR "cancer spread"[tiab]) OR metastasis[tiab]) OR metastases[tiab]) OR "metastatic cancer"[tiab]) OR "metastatic cancers"[tiab]) OR "metastatic carcinoma"[tiab]) OR "metastatic carcinomas"[tiab]) OR "metastatic disease"[tiab]) OR "metastatic tumor"[tiab]) OR "metastatic tumour"[tiab]) OR "metastatic tumors"[tiab]) OR "metastatic tumours"[tiab]) OR "secondary cancer"[tiab]) OR "secondary carcinoma"[tiab]) OR "tumor metastasis"[tiab]) OR "tumor spread"[tiab]) OR "tumour metastasis"[tiab]) OR "tumour spread"[tiab])

Web of Science 902 hits on 01/03/2019

caregivers OR caregiver OR carer OR carers OR "family caregiver" OR "family caregivers" OR "informal caregiver" OR "informal caregivers" OR spouses OR spouse OR partner OR husband OR wife OR family OR "next of kin" OR dependants OR dependents OR "adult children" OR fathers OR father OR mothers OR mother OR grandparents OR grandparent OR grand-parent\* OR siblings OR sibling OR brother\* OR sister\* OR friends OR friend OR relatives

"psychological resilience" OR "personal resilience" OR resilience OR resiliency OR resilient OR well-being OR wellbeing OR "equanimity" OR "perseverance" OR "self-reliance" OR "meaningfulness" OR "existential aloneness" OR "flexibility" OR "positivism" OR "self-initiative" OR "positive psychological functioning" OR "emotional adjustment" OR "emotional equilibrium" OR "personal adjustment" OR "psychological adjustment" OR "emotional competence" OR "psychological adaptation" OR "coping behavior" OR "coping behaviour" OR "coping ability" OR "coping mechanism" OR coping-mechanism\* OR "coping strategy" OR "psychologic adaptation" OR "personal growth" OR "post-traumatic growth" OR PTG OR "healthy adjustment" OR "benefit finding" OR "positive outcome" OR beneficial OR "perceived rewards" OR "positive consequences" OR "self efficacy" OR "positive coping" OR "adaptive coping" OR "problem solving skills" OR "coping skills" OR "interpersonal skills" OR "social skills" OR "social skill" OR "social competence" OR "social ability"

"advanced cancer" OR "incurable cancer" OR "palliative cancer" OR "terminal cancer" OR "cancer dissemination" OR "cancer metastasis" OR "carcinoma metastasis" OR "cancer spread" OR metastasis OR metastases OR "metastatic cancer" OR "metastatic cancers" OR "metastatic carcinoma" OR "metastatic carcinomas" OR "metastatic disease" OR "metastatic tumor" OR "metastatic tumour" OR "metastatic tumors" OR "metastatic tumours" OR "secondary cancer" OR "secondary carcinoma" OR "tumor metastasis" OR "tumor spread" OR "tumour metastasis" OR "tumour spread"

**Embase**            **1156 hits on 01/03/2019**

('caregiver'/exp OR 'care giver':ti,ab,kw OR 'caregiver':ti,ab,kw OR 'caregivers':ti,ab,kw OR 'carer':ti,ab,kw OR 'carers':ti,ab,kw OR 'family caregiver':ti,ab,kw OR 'family caregivers':ti,ab,kw OR 'informal caregiver':ti,ab,kw OR 'spouse'/exp OR 'spouse':ti,ab,kw OR 'spouses':ti,ab,kw OR 'partner':ti,ab,kw OR 'husband'/exp OR 'husband':ti,ab,kw OR 'wife'/exp OR 'wife':ti,ab,kw OR 'family'/de OR 'next of kin':ti,ab,kw OR 'dependants':ti,ab,kw OR 'dependents':ti,ab,kw OR 'family':ti,ab,kw OR 'adult children':ti,ab,kw OR 'father'/de OR 'father':ti,ab,kw OR 'fathers':ti,ab,kw OR 'mother'/de OR 'mother':ti,ab,kw OR 'mothers':ti,ab,kw OR 'grandparent'/exp OR 'grand-parent':ti,ab,kw OR 'grand-parents':ti,ab,kw OR 'grandparent':ti,ab,kw OR 'grandparents':ti,ab,kw OR 'sibling'/exp OR 'sibling':ti,ab,kw OR 'siblings':ti,ab,kw OR 'friend'/exp OR 'friend':ti,ab,kw OR 'friends':ti,ab,kw OR 'relatives':ti,ab,kw) AND ('psychological resilience'/exp OR 'personal resilience':ti,ab,kw OR 'psychological resilience':ti,ab,kw OR resiliency:ti,ab,kw OR resilient:ti,ab,kw OR 'equanimity':ti,ab,kw OR 'perseverance':ti,ab,kw OR 'self-reliance':ti,ab,kw OR 'meaningfulness':ti,ab,kw OR 'existential aloneness':ti,ab,kw OR 'flexibility':ti,ab,kw OR 'positivism':ti,ab,kw OR 'self-initiative':ti,ab,kw OR 'wellbeing'/exp OR 'well being':ti,ab,kw OR 'wellbeing':ti,ab,kw OR 'positive psychological functioning':ti,ab,kw OR 'coping behavior'/exp OR 'coping':ti,ab,kw OR 'coping ability':ti,ab,kw OR 'coping behavior':ti,ab,kw OR 'coping behaviour':ti,ab,kw OR 'coping mechanism':ti,ab,kw OR 'coping strategy':ti,ab,kw OR 'psychologic adaptation':ti,ab,kw OR 'psychological adaptation':ti,ab,kw OR adaptation:ti,ab,kw OR 'personal growth':ti,ab,kw OR pg:ti,ab,kw OR 'post traumatic growth':ti,ab,kw OR ptg:ti,ab,kw OR 'healthy adjustment':ti,ab,kw OR 'benefit finding'/exp OR 'benefit-finding':ti,ab,kw OR 'positive outcome':ti,ab,kw OR beneficial\*:ti,ab,kw OR 'perceived rewards':ti,ab,kw OR 'positive consequences':ti,ab,kw OR 'psychological adjustment'/de OR 'emotional adaptation':ti,ab,kw OR 'emotional adjustment':ti,ab,kw OR 'emotional equilibrium':ti,ab,kw OR 'personal adjustment':ti,ab,kw OR 'psychological adjustment':ti,ab,kw OR 'emotional competence':ti,ab,kw OR 'self efficacy':ti,ab,kw OR 'positive coping':ti,ab,kw OR 'adaptive coping':ti,ab,kw OR 'coping well':ti,ab,kw OR 'problem solving skills':ti,ab,kw OR 'coping skills':ti,ab,kw OR 'social competence'/exp OR 'interpersonal skill':ti,ab,kw OR 'interpersonal skills':ti,ab,kw OR 'social ability':ti,ab,kw OR 'social competence':ti,ab,kw OR 'social skill':ti,ab,kw OR 'social skills':ti,ab,kw) AND ('advanced cancer'/exp OR 'advanced cancer':ti,ab,kw OR 'incurable cancer':ti,ab,kw OR 'palliative cancer':ti,ab,kw OR 'terminal cancer':ti,ab,kw OR 'metastasis'/exp OR 'cancer dissemination':ti,ab,kw OR 'cancer metastasis':ti,ab,kw OR 'cancer spread':ti,ab,kw OR 'carcinoma metastasis':ti,ab,kw OR 'metastases':ti,ab,kw OR 'metastasis':ti,ab,kw OR 'metastatic cancer':ti,ab,kw OR 'metastatic cancers':ti,ab,kw OR 'metastatic carcinoma':ti,ab,kw OR 'metastatic carcinomas':ti,ab,kw OR 'metastatic disease':ti,ab,kw OR 'metastatic tumor':ti,ab,kw OR 'metastatic

tumors':ti,ab,kw OR 'metastatic tumour':ti,ab,kw OR 'metastatic tumours':ti,ab,kw OR 'secondary  
cancer':ti,ab,kw OR 'secondary carcinoma':ti,ab,kw OR 'tumor metastasis':ti,ab,kw OR 'tumor spread':ti,ab,kw  
OR 'tumour metastasis':ti,ab,kw)

Cinahl 209 hits on 01/03/2019

( (MH "Caregivers") OR TI,AB ( carers OR caregivers OR "family members" or relatives OR "informal caregivers" ) OR TI,AB caregiver TI,AB carer OR TI,AB "family caregiver\*" OR TI,AB "informal caregiver\*" OR (MH "Spouses") OR TI,AB spouse\* OR TI,AB partner\* OR TI,AB husband\* OR TI,AB wife OR TI,AB wives OR (MH "Family") OR TI,AB family OR TI,AB "next of kin" OR TI,AB dependent\* OR TI,AB dependant\* OR TI,AB "adult children" OR TI,AB father\* OR TI,AB mother\* OR TI,AB grandparent\* OR TI,AB grand-parent\* OR (MH "Siblings") OR TI,AB sibling\* OR TI,AB brother\* OR TI,AB sister\* OR TI,AB friends OR TI,AB friend ) AND ( (MH "Adaptation, Psychological") OR TI,AB "psychological adaptation" OR TI,AB resilience OR TI,AB "psychological resilience" OR TI,AB resiliency OR TI,AB resilient OR TI,AB equanimity OR TI,AB perseverance OR TI,AB self-reliance OR TI,AB meaningfulness OR TI,AB "existential aloneness" OR TI,AB flexibility" OR TI,AB positivism OR TI,AB "self-initiative" OR (MH "Psychological Well-Being") OR TI,AB ( wellbeing OR well-being OR well being ) OR TI,AB "positive psychological functioning" OR (MH "Coping") OR TI,AB coping OR TI,AB ( "coping behavior" OR "coping behaviour" ) OR TI,AB "coping ability" OR TI,AB "coping mechanism\*" OR TI,AB "coping strategy" OR TI,AB "personal growth" OR TI,AB "post traumatic growth" OR TI,AB "healthy adjustment" OR TI,AB "benefit finding" OR TI,AB "positive outcome\*" OR TI,AB beneficial\* OR TI,AB "perceived reward\*" OR TI,AB "positive consequences" OR TI,AB "psychological adjustment" OR TI,AB "emotional adaptation" OR TI,AB "emotional adjustment" OR TI,AB "emotional equilibrium" OR TI,AB "personal adjustment" OR TI,AB ( "emotional competence" OR "emotional competencies" ) OR (MH "Self-Efficacy") OR TI,AB "self-efficacy" OR TI,AB "positive coping" OR TI,AB "adaptive coping" OR TI,AB "coping well" OR TI,AB "problem solving skills" OR TI,AB "coping skills" OR TI,AB "social competence" OR TI,AB "interpersonal skills" OR TI,AB "social ability" OR TI,AB "social skill\*" ) ) AND ( (MH "Neoplasms") OR TI,AB ( "advanced cancer" OR "incurable cancer" OR "palliative cancer" OR "terminal cancer" ) OR TI,AB ( metastasis OR metastases OR "metastatic cancer\*" OR "metastatic tumor\*" OR "metastatic tumour\*" OR "carcinoma metastasis" OR "metastatic carcinoma\*" ) OR TI,AB ( "cancer dissemination" OR "cancer spread" OR "cancer metastasis" OR "cancer metastases" OR "tumor spread" ) OR TI,AB ( "metastatic disease" OR "secondary cancer" OR "tumor metastases" OR "tumour metastases" OR "tumor metastasis" OR "tumor metastases" ) ) )

PsycInfo

14 hits on 01/03/2019

( (MH "Caregivers") OR TI ( carers OR caregivers OR "family members" or relatives OR "informal caregivers" ) OR AB ( carers OR caregivers OR "family members" OR relatives OR "informal caregivers" ) OR TI caregiver OR AB caregiver OR TI carer OR AB carer OR TI "family caregiver\*" OR AB "family caregiver\*" OR TI "informal caregiver\*" OR AB "informal caregiver\*" OR (MH "Spouses") OR TI spouse\* OR AB spouse\* OR TI partner\* OR AB partner\* OR TI husband\* OR AB husband\* OR TI wife OR AB wife OR TI wives OR AB wives OR (MH "Family") OR TI family OR AB family OR TI "next of kin" OR AB "next of kin" OR TI dependent\* OR AB dependent\* OR TI dependant\* OR AB dependant OR TI "adult children" OR AB "adult children" OR TI father\* OR AB father\* OR TI mother\* OR AB mother\* OR TI grandparent\* OR AB grandparent\* OR TI grand-parent\* OR AB grand-parent\* OR (MH "Siblings") OR TI sibling\* OR AB sibling\* OR TI brother\* OR AB brother\* OR TI sister\* OR AB sister\* OR TI friends OR AB friends OR TI friend OR AB friend OR TI relatives OR AB relatives ) AND ( (MH "Adaptation, Psychological") OR TI "psychological adaptation" OR AB "psychological adaptation" OR TI resilience OR AB resilience OR TI "psychological resilience" OR AB "psychological resilience" OR TI resiliency OR AB resiliency OR TI resilient OR AB resilient OR TI equanimity OR AB Equanimity OR TI perseverance OR AB perseverance OR TI self-reliance OR AB self-reliance OR TI meaningfulness OR AB meaningfulness OR TI "existential aloneness" OR AB "existential aloneness OR TI flexibility or AB flexibility OR TI positivism OR AB positivism OR TI self-initiative OR AB self-initiative OR (MH "Psychological Well-Being") OR TI ( wellbeing OR well-being OR well being ) OR AB ( wellbeing OR well-being OR well being ) OR TI "positive psychological functioning" OR AB "positive psychological functioning" OR (MH "Coping") OR TI coping OR AB coping OR TI ( "coping behavior" OR "coping behaviour" ) OR AB ( "coping behavior" OR "coping behaviour" ) OR TI "coping ability" OR AB "coping ability" OR TI "coping mechanism\*" OR AB "coping mechanism\*" OR TI "coping strategy" OR AB "coping strategy" OR TI "personal growth" OR AB "personal growth" OR TI "post traumatic growth" OR AB "post traumatic growth" OR TI "healthy adjustment" OR AB "healthy adjustment" OR TI "benefit finding" OR AB "benefit finding" OR TI "positive outcome\*" OR AB "positive outcome\*" OR TI beneficial\* OR AB beneficial\* OR TI "perceived reward\*" OR AB "perceived reward\*" OR TI "positive consequences" OR AB "positive consequences" OR TI "psychological adjustment" OR AB "psychological adjustment" OR TI "emotional adaptation" OR AB "emotional adaptation" OR TI "emotional adjustment" OR AB "emotional adjustment" OR TI "emotional equilibrium" OR AB "emotional equilibrium" OR TI "personal adjustment" OR AB "personal adjustment" OR TI ( "emotional competence" OR "emotional competencies" ) OR AB ( "emotional competence" OR "emotional competencies" ) OR (MH "Self-Efficacy") OR TI "self-efficacy" OR

AB "self-efficacy" OR TI "positive coping" OR AB "positive coping" OR TI "adaptive coping" OR AB "adaptive coping" OR TI "coping well" OR AB "coping well" OR TI "problem solving skills" OR AB "problem solving skills" OR TI "coping skills" OR AB "coping skills" OR TI "social competence" OR AB "social competence" OR TI "interpersonal skills" OR AB "interpersonal skills" OR TI "social ability" OR AB "social ability" OR TI "social skill\*" OR AB "social skill" ) AND ( (MH "Neoplasms") OR TI ( "advanced cancer" or "incurable cancer" or "palliative cancer" or "terminal cancer" ) OR AB ( "advanced cancer" or "incurable cancer" or "palliative cancer" or "terminal cancer" ) OR TI ( metastasis or metastases or "metastatic cancer\*" or "metastatic tumor\*" or "metastatic tumour\*" or "carcinoma metastasis" or "metastatic carcinoma\*" ) OR AB ( metastasis or metastases or "metastatic cancer\*" or "metastatic tumor\*" or "metastatic tumour\*" or "carcinoma metastasis" or "metastatic carcinoma\*" ) OR TI ( "cancer dissemination" or "cancer spread" or "cancer metastasis" or "cancer metastases" or "tumor spread" ) OR AB ( "cancer dissemination" or "cancer spread" or "cancer metastasis" or "cancer metastases" or "tumor spread" ) OR TI ( "metastatic disease" or "secondary cancer" or "tumor metastases" or "tumour metastases" or "tumor metastasis" or "tumor metastases" ) OR AB ( "metastatic disease" or "secondary cancer" or "tumor metastases" or "tumour metastases" or "tumor metastasis" or "tumor metastases" ) )

**Total number of articles: 5121**

**Duplicates 936**

**To Rayyan: 4185**
