# Supplementary material for: Resilience in advanced cancer caregiving. A systematic review and meta-synthesis
Source: PubMed Central journal article supplement — Palliat Med. 2022 Jan 5;36(1):44–58. doi: 10.1177/02692163211057749 (PMC8796166; doi:10.1177/02692163211057749), 2022-01-05
Supplement: sj-pdf-3-pmj-10.1177_02692163211057749.pdf [file sj-pdf-3-pmj-10.1177_02692163211057749.pdf]

**Supplement 3. Quality assessment of the included studies using the critical appraisal skills program (CASP).**

| Author                         | Statement of the aims (1) | Methodology (2) | Research design (3) | Recruitment strategy (4) | Data collection (5) | Relationship between researcher and participants (6) | Ethical consideration (7) | Rigor (8) | Statement of findings (9) |
|--------------------------------|---------------------------|-----------------|---------------------|--------------------------|---------------------|------------------------------------------------------|---------------------------|-----------|---------------------------|
| Benkel (2010) <sup>26</sup>    | yes                       | yes             | yes                 | yes                      | yes                 | no                                                   | yes                       | yes       | yes                       |
| Hudson(2004) <sup>22</sup>     | no                        | yes             | yes                 | No                       | no                  | no                                                   | yes                       | no        | yes                       |
| Engeli (2016) <sup>31</sup>    | yes                       | yes             | yes                 | yes                      | yes                 | no                                                   | yes                       | yes       | yes                       |
| Sand (2010) <sup>27</sup>      | yes                       | yes             | yes                 | yes                      | yes                 | no                                                   | yes                       | yes       | yes                       |
| Milberg (2011) <sup>28</sup>   | yes                       | yes             | yes                 | yes                      | no                  | no                                                   | yes                       | yes       | yes                       |
| Mosher (2017) <sup>32</sup>    | yes                       | yes             | yes                 | yes                      | yes                 | yes                                                  | yes                       | yes       | yes                       |
| Mosher (2015) <sup>30</sup>    | yes                       | yes             | yes                 | yes                      | yes                 | yes                                                  | yes                       | yes       | yes                       |
| Opsomer (2019) <sup>35</sup>   | yes                       | yes             | yes                 | yes                      | yes                 | yes                                                  | yes                       | yes       | yes                       |
| Roen (2018) <sup>34</sup>      | yes                       | yes             | yes                 | yes                      | yes                 | no                                                   | yes                       | yes       | yes                       |
| Rose (1987) <sup>20</sup>      | no                        | yes             | yes                 | no                       | yes                 | no                                                   | no                        | yes       | yes                       |
| Sjolander (2011) <sup>29</sup> | yes                       | yes             | yes                 | yes                      | yes                 | no                                                   | yes                       | yes       | yes                       |

|                                       |     |     |     |     |     |     |     |     |     |
|---------------------------------------|-----|-----|-----|-----|-----|-----|-----|-----|-----|
| <b>Sparla (2017)</b> <sup>33</sup>    | yes | yes | yes | yes | yes | no  | yes | yes | yes |
| <b>Stajduhar (2008)</b> <sup>23</sup> | yes | yes | yes | yes | yes | no  | yes | yes | yes |
| <b>Strang (2003)</b> <sup>21</sup>    | yes | yes | yes | yes | no  | no  | yes | yes | yes |
| <b>Walshe (2017)</b> <sup>11</sup>    | yes |
| <b>Wong (2009)</b> <sup>24</sup>      | yes | yes | yes | no  | yes | no  | yes | yes | yes |
| <b>Wong (2009)</b> <sup>25</sup>      | yes | yes | yes | no  | yes | no  | yes | yes | yes |

- (1) Was there a clear statement of the aims of the research?
- (2) Is a qualitative methodology appropriate?
- (3) Was the research design appropriate to address the aims of the research?
- (4) Was the recruitment strategy appropriate to the aims of the research?
- (5) Was the data collected in a way that addressed the research issue?
- (6) Has the relationship between researcher and participants been adequately considered?
- (7) Have ethical issues been taken into consideration?
- (8) Was the data analysis sufficiently rigorous?
- (9) Is there a clear statement of findings?
