# Supplementary material for: Resilience in advanced cancer caregiving. A systematic review and meta-synthesis
Source: PubMed Central journal article supplement — Palliat Med. 2022 Jan 5;36(1):44–58. doi: 10.1177/02692163211057749 (PMC8796166; doi:10.1177/02692163211057749), 2022-01-05
Supplement: sj-pdf-6-pmj-10.1177_02692163211057749.pdf [file sj-pdf-6-pmj-10.1177_02692163211057749.pdf]

## Supplement 6: Authors' contributions to the review

|                                                     | SO | EL | JDL | PP |
|-----------------------------------------------------|----|----|-----|----|
| <b>Conceptualization and design</b>                 | X  |    | X   | X  |
| <b>Conduction of the search strategy</b>            | X  |    |     |    |
| <b>Article selection</b>                            | X  | X  | X   | X  |
| <b>Critical appraisal</b>                           | X  | X  |     |    |
| <b>Data analysis</b>                                | X  | X  | X   | X  |
| <b>writing – original draft and final version</b>   | X  |    |     |    |
| <b>Review and editing</b>                           |    | X  | X   | X  |
| <b>Critically revising for intellectual content</b> |    | X  | X   | X  |
| <b>Supervision</b>                                  |    |    | X   | X  |
| <b>Approval of the final version</b>                | X  | X  | X   | X  |
| <b>Accountable for all aspects of the review</b>    | X  | X  | X   | X  |
